# Supplementary material for: Population genetics and microevolution of clinical Candida glabrata reveals recombinant sequence types and hyper-variation within mitochondrial genomes, virulence genes, and drug targets
Source: PubMed Central journal article supplement (PMC9071574; doi:10.1093/genetics/iyac031), 2022-02-23
Supplement: iyac031_supplementary_figure_s1.pdf [file iyac031_supplementary_figure_s1.pdf]

A)

B)

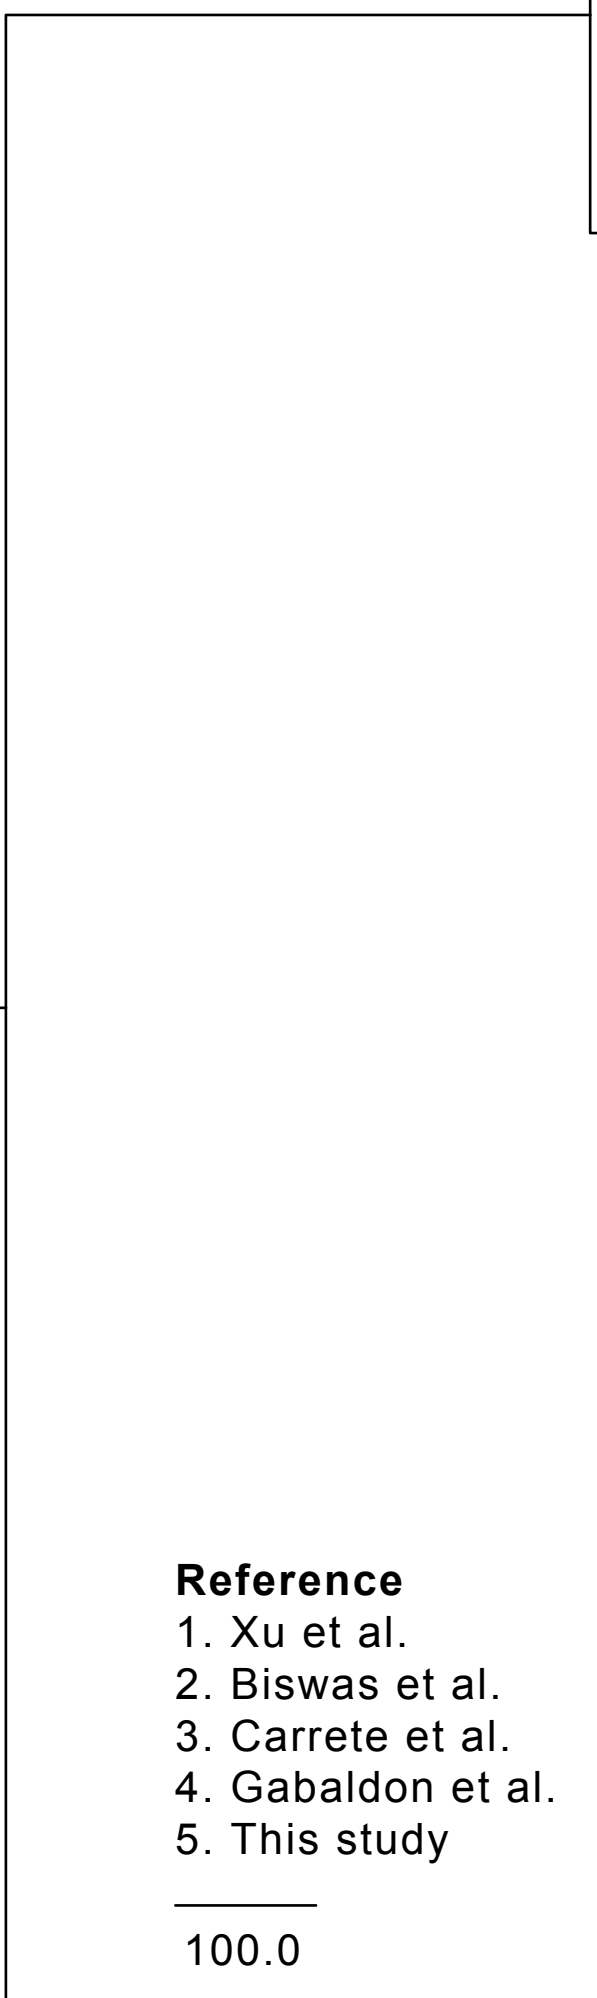

**Reference**

1. Xu et al.
2. Biswas et al.
3. Carrete et al.
4. Gabaldon et al.
5. This study

100.0

| Clade | ST  | Country | MAT   | Reference |
|-------|-----|---------|-------|-----------|
| 5.3   | 15  | BE      | ?     | 1         |
| 5.3   | 15  | GB      | ?     | 5         |
| 5.3   | 204 | GB      | ?     | 5         |
| 3     | 8   | US      | a     | 3         |
| 3     | 8   | US      | alpha | 3         |
| 3     | 8   | AU      | ?     | 2         |
| 3     | 8   | AU      | ?     | 2         |
| 3     | 8   | GB      | ?     | 5         |
| 3     | 8   | FR      | a     | 3         |
| 3     | 8   | US      | a     | 3         |
| 3     | 8   | FR      | a     | 3         |
| 3     | 8   | GB      | ?     | 5         |
| 3     | 8   | FR      | a     | 3         |
| 3     | 8   | GB      | ?     | 5         |
| 5.1   | 10  | GB      | ?     | 5         |
| 5.1   | 10  | GB      | ?     | 5         |
| 5.1   | 10  | GB      | ?     | 5         |
| 5.1   | 10  | GB      | ?     | 5         |
| 5.1   | 10  | GB      | ?     | 5         |
| 5.1   | 10  | GB      | ?     | 5         |
| 5.1   | 10  | GB      | ?     | 5         |
| 5.1   | 10  | GB      | ?     | 5         |
| 5.1   | 10  | FR      | a     | 3         |
| 5.1   | 10  | GB      | ?     | 5         |
| 5.1   | 10  | GB      | ?     | 5         |
| 5.1   | 10  | GB      | ?     | 5         |
| 5.1   | 10  | AU      | ?     | 2         |
| 5.1   | 10  | GB      | ?     | 5         |
| 5.1   | 10  | GB      | ?     | 5         |
| 5.1   | 25  | GB      | ?     | 5         |
| 4     | 22  | GB      | ?     | 5         |
| 4     | 22  | FR      | ?     | 3         |
| 4     | 22  | GB      | ?     | 5         |
| 4     | 22  | AU      | ?     | 2         |
| 4     | 22  | FR      | a     | 3         |
| 4     | 22  | AU      | ?     | 2         |
| 4     | 22  | FR      | a     | 3         |
| 5.2   | 6   | GB      | ?     | 5         |
| 5.2   | 6   | GB      | ?     | 5         |
| 5.2   | 6   | GB      | ?     | 5         |
| 5.2   | 6   | FR      | a     | 3         |
| 5.2   | 6   | GB      | ?     | 5         |
| 5.2   | 6   | GB      | ?     | 5         |
| 5.2   | 6   | GB      | ?     | 5         |
| 5.2   | 6   | AU      | ?     | 2         |
| 67    | 67  | GB      | ?     | 5         |
| 67    | 67  | GB      | ?     | 5         |
| 67    | 67  | GB      | ?     | 5         |
| 67    | 67  | GB      | ?     | 5         |
| 26    | 26  | AU      | ?     | 2         |
| 26    | 26  | AU      | ?     | 2         |
| 26    | 26  | AU      | ?     | 2         |
| 26    | 26  | AU      | ?     | 2         |
| 18    | 18  | AU      | ?     | 2         |
| 177   | 177 | GB      | ?     | 5         |
| 36    | 36  | GB      | ?     | 5         |
| 36    | 36  | GB      | ?     | 5         |
| 36    | 36  | GB      | ?     | 5         |
| 36    | 36  | AU      | ?     | 2         |
| 36    | 36  | GB      | ?     | 5         |
| 123   | 123 | AU      | ?     | 2         |
| 123   | 123 | GB      | ?     | 5         |
| 123   | 123 | AU      | ?     | 2         |
| 123   | 123 | AU      | ?     | 2         |
| 123   | 123 | AU      | ?     | 2         |
| 83    | 83  | AU      | ?     | 2         |
| 83    | 83  | AU      | ?     | 2         |
| 83    | 83  | AU      | ?     | 2         |
| 83    | 83  | AU      | ?     | 2         |
| 83    | 83  | AU      | ?     | 2         |
| 83    | 83  | AU      | ?     | 2         |
| 83    | 83  | AU      | ?     | 2         |
| 83    | 83  | GB      | ?     | 5         |
| 126   | 126 | AU      | ?     | 2         |
| 124   | 124 | AU      | ?     | 2         |
| 16    | 16  | AU      | ?     | 2         |
| 16    | 16  | AU      | ?     | 2         |
| 136   | 136 | IW      | a     | 3         |
| 136   | 136 | IW      | alpha | 3         |
| 45    | 45  | AU      | ?     | 2         |
| 147   | 147 | GB      | ?     | 5         |
| 3     | 3   | DE      | a     | 3         |
| 3     | 3   | FR      | a     | 3         |
| 3     | 3   | AU      | ?     | 2         |
| 3     | 3   | BE      | a     | 3         |
| 3     | 3   | FR      | alpha | 3         |
| 3     | 3   | GB      | ?     | 5         |
| 3     | 3   | AU      | ?     | 2         |
| 3     | 3   | AU      | ?     | 2         |
| 3     | 3   | AU      | ?     | 2         |
| 3     | 3   | AU      | ?     | 2         |
| 3     | 3   | AU      | ?     | 2         |
| 3     | 3   | GB      | ?     | 5         |
| 3     | 3   | US      | a     | 3         |
| 3     | 3   | GB      | ?     | 5         |
| 3     | 3   | AU      | ?     | 2         |
| 3     | 3   | AU      | ?     | 2         |
| 3     | 3   | AU      | ?     | 2         |
| 3     | 3   | AU      | ?     | 2         |
| 3     | 3   | US      | a     | 3         |
| 3     | 3   | US      | a     | 3         |
| 24    | 24  | GB      | ?     | 5         |
| 24    | 24  | GB      | ?     | 5         |
| 4     | 4   | GB      | ?     | 5         |
| 4     | 4   | GB      | ?     | 5         |
| 46    | 46  | AU      | ?     | 2         |
| 46    | 46  | AU      | ?     | 2         |
| 46    | 46  | AU      | ?     | 2         |
| 59    | 59  | AU      | ?     | 2         |
| 19    | 19  | GB      | ?     | 5         |
| 19    | 19  | US      | alpha | 3         |
| 19    | 19  | US      | alpha | 3         |
| 19    | 19  | US      | alpha | 3         |
| 19    | 19  | BE      | alpha | 3         |
| 19    | 19  | BE      | alpha | 3         |
| 19    | 19  | BE      | alpha | 3         |
| 19    | 19  | US      | alpha | 3         |
| 19    | 19  | BE      | alpha | 3         |
| 162   | 162 | GB      | ?     | 5         |
| 162   | 162 | GB      | ?     | 5         |
| 162   | 162 | GB      | ?     | 5         |
| 162   | 162 | GB      | ?     | 5         |
| 162   | 162 | GB      | ?     | 5         |
| 162   | 162 | GB      | ?     | 5         |
| 162   | 162 | GB      | ?     | 5         |
| 162   | 162 | GB      | ?     | 5         |
| 7     | 7   | AU      | ?     | 2         |
| 7     | 7   | AU      | ?     | 2         |
| 7     | 7   | AU      | ?     | 2         |
| 7     | 7   | AU      | ?     | 2         |
| 7     | 7   | GB      | ?     | 5         |
| 7     | 7   | GB      | ?     | 5         |
| 7     | 7   | GB      | ?     | 5         |
| 7     | 7   | BE      | alpha | 3         |
| 7     | 7   | US      | alpha | 3         |
| 55    | 55  | GB      | ?     | 5         |
| 55    | 55  | AU      | ?     | 2         |
| 55    | 55  | AU      | ?     | 2         |
| 55    | 55  | GB      | ?     | 5         |
| 55    | 55  | GB      | ?     | 5         |
| N/A   | N/A | ?       | ?     | 4         |

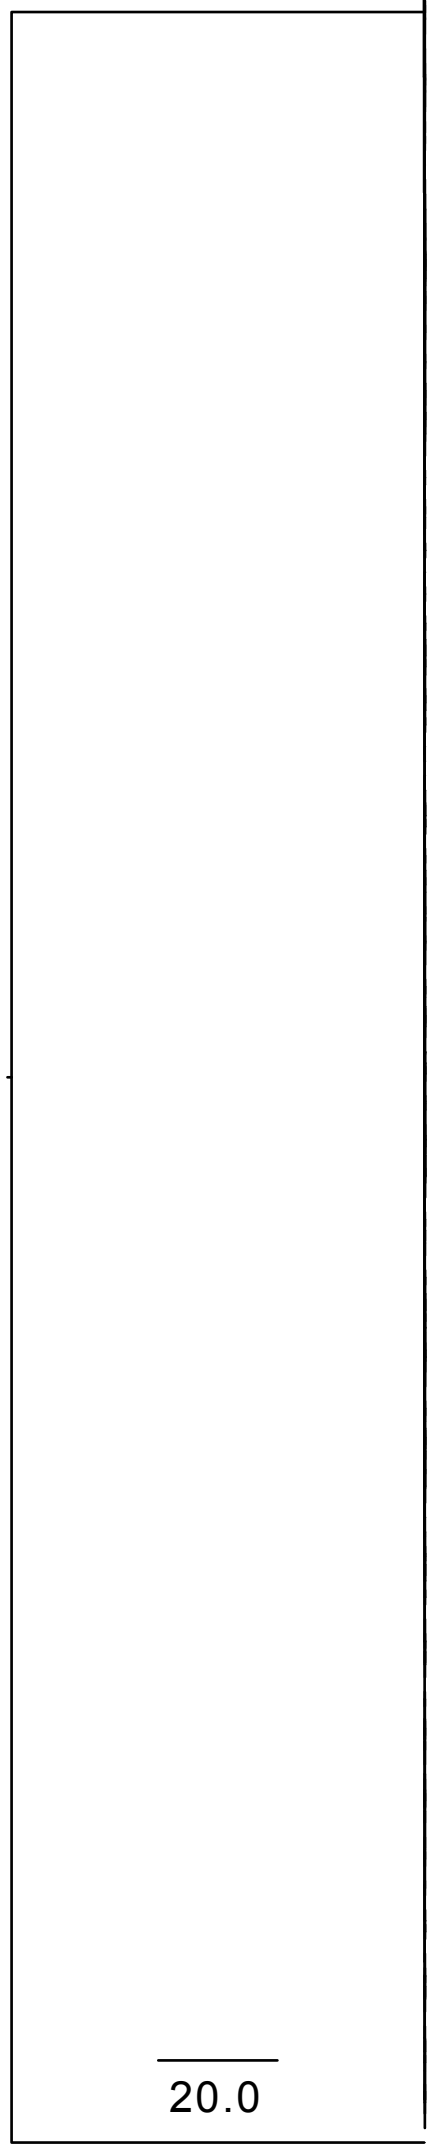

20.0

|                     |
|---------------------|
| CBS138              |
| CG151               |
| CG57                |
| F1822               |
| CG127               |
| CG52                |
| F1019               |
| I1718               |
| M12                 |
| WM18.63             |
| WM18.64             |
| CST178              |
| M17                 |
| F2229               |
| CG82                |
| WM18.45             |
| WM18.34             |
| CST110              |
| M6                  |
| WM18.44             |
| F15021              |
| F03013              |
| CG174               |
| WM18.59             |
| E1114               |
| EG01004Sto          |
| WM18.30             |
| WM18.55             |
| WM18.35             |
| CG203               |
| WM04.194            |
| CG167               |
| BG2                 |
| CG69B               |
| WM18.60             |
| CG46                |
| CG153               |
| CG166               |
| WM18.24             |
| WM18.52             |
| WM18.57             |
| P35_2               |
| P35_3               |
| WM18.66             |
| CG68A               |
| CG77                |
| B1012S              |
| EB101M              |
| B1012M              |
| BO101S              |
| CST109              |
| M7                  |
| CT80                |
| CG119               |
| CST34               |
| WM18.31             |
| CG133               |
| WM05.155            |
| WM18.50             |
| WM18.40             |
| WM18.47             |
| WM18.51             |
| CG93B               |
| CG93J               |
| CG93E               |
| CG93C               |
| CG93I               |
| CG93H               |
| CG93A               |
| CG93D               |
| CG93K               |
| CG124               |
| CG144               |
| CG53                |
| WM05.111            |
| WM18.62             |
| WM04.387            |
| CST35               |
| EB0911Sto           |
| CG157               |
| CG78                |
| WM03.698            |
| CG48A               |
| WM03.308            |
| WM04.242            |
| CG48F               |
| WM18.33             |
| CG146               |
| CG84F               |
| CG84H               |
| CG84G               |
| CG121               |
| CG12                |
| F11                 |
| CG42                |
| CG120               |
| CG150               |
| CG79                |
| WM18.38             |
| CG55                |
| EF1237Blo1          |
| CG54                |
| WM18.37             |
| WM18.56             |
| EF0616Blo1          |
| E11815Blo1          |
| EF1620Sto           |
| CG1                 |
| WM05.113            |
| WM18.67             |
| WM18.27             |
| WM18.36             |
| CG107A              |
| CG107B              |
| CG58                |
| CG58                |
| CG162               |
| CG77                |
| CG68A               |
| WM18.40             |
| WM18.51             |
| WM18.47             |
| WM18.50             |
| CG119               |
| M7                  |
| CST80               |
| CST34               |
| BO101S              |
| EB101M              |
| B1012M              |
| CST109              |
| B1012S              |
| CG93H               |
| CG93K               |
| CG93E               |
| CG93B               |
| CG93J               |
| CG93I               |
| CG93D               |
| CG93A               |
| CG93C               |
| WM03.698            |
| WM18.33             |
| WM04.242            |
| CG48F               |
| WM03.308            |
| CG48A               |
| CG157               |
| CG78                |
| EB0911Sto           |
| CST35               |
| WM04.387            |
| CG53                |
| WM05.111            |
| WM18.62             |
| CG124               |
| CG144               |
| CG43                |
| C. braccarensis AGP |

C. braccarensis AGP
