# Supplementary material for: Population genetics and microevolution of clinical Candida glabrata reveals recombinant sequence types and hyper-variation within mitochondrial genomes, virulence genes, and drug targets
Source: PubMed Central journal article supplement (PMC9071574; doi:10.1093/genetics/iyac031), 2022-02-23

# Position in genome (Mb)

0 6 12

1  
0 FST

ST7 vs ST19

ST7 vs ST46

ST7 vs ST55

ST7 vs ST59

ST7 vs ST162

ST16 vs ST136

ST18 vs ST26

ST19 vs ST55

ST19 vs ST59

ST19 vs ST162

ST46 vs ST59

ST55 vs ST162

chrA chrB chrC chrD chrE chrF chrM chrH chl chrJ chrK chrL chrG

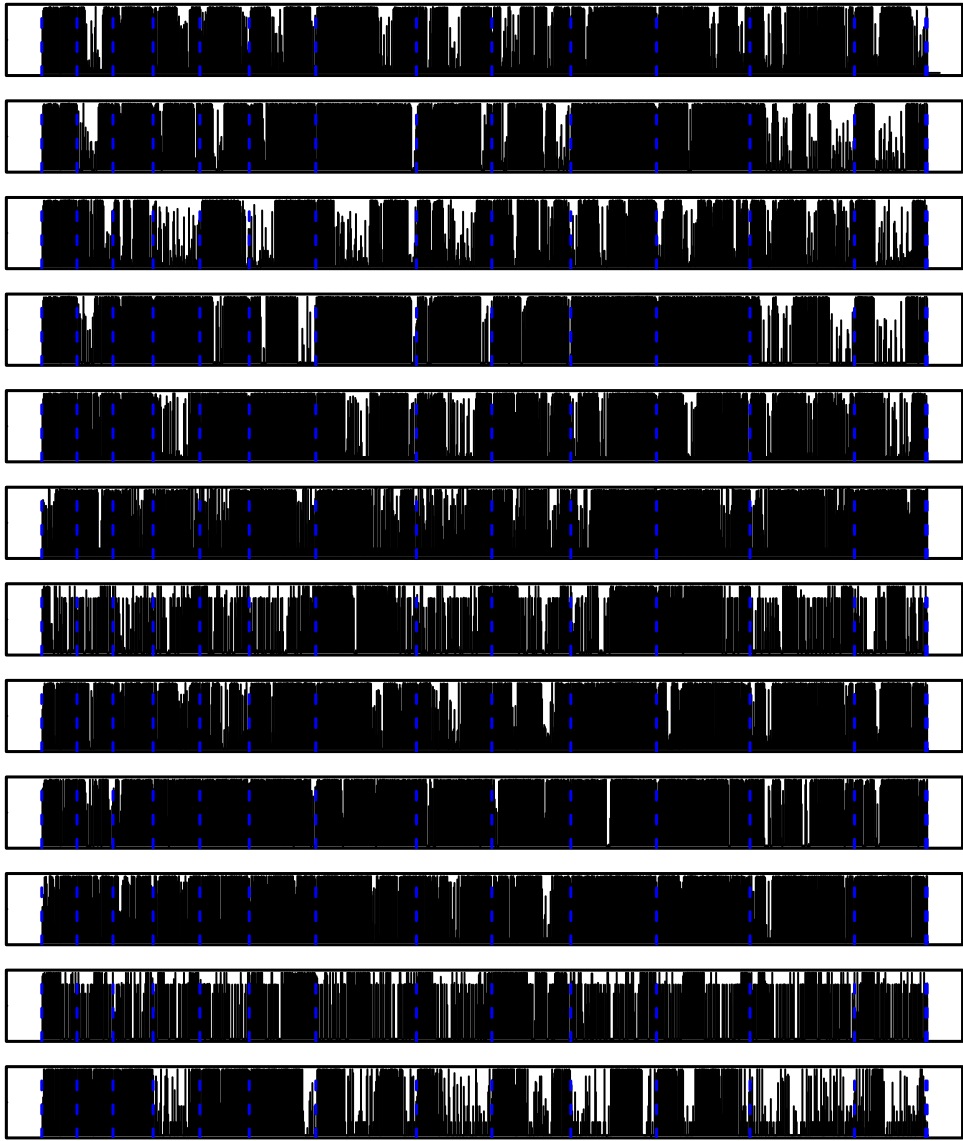

Supplement: iyac031_supplementary_figure_s3.pdf [file iyac031_supplementary_figure_s3.pdf]
