# Supplementary material for: Population genetics and microevolution of clinical Candida glabrata reveals recombinant sequence types and hyper-variation within mitochondrial genomes, virulence genes, and drug targets
Source: PubMed Central journal article supplement (PMC9071574; doi:10.1093/genetics/iyac031), 2022-02-23

Position in genome (Mb)

Position in genome (Mb)

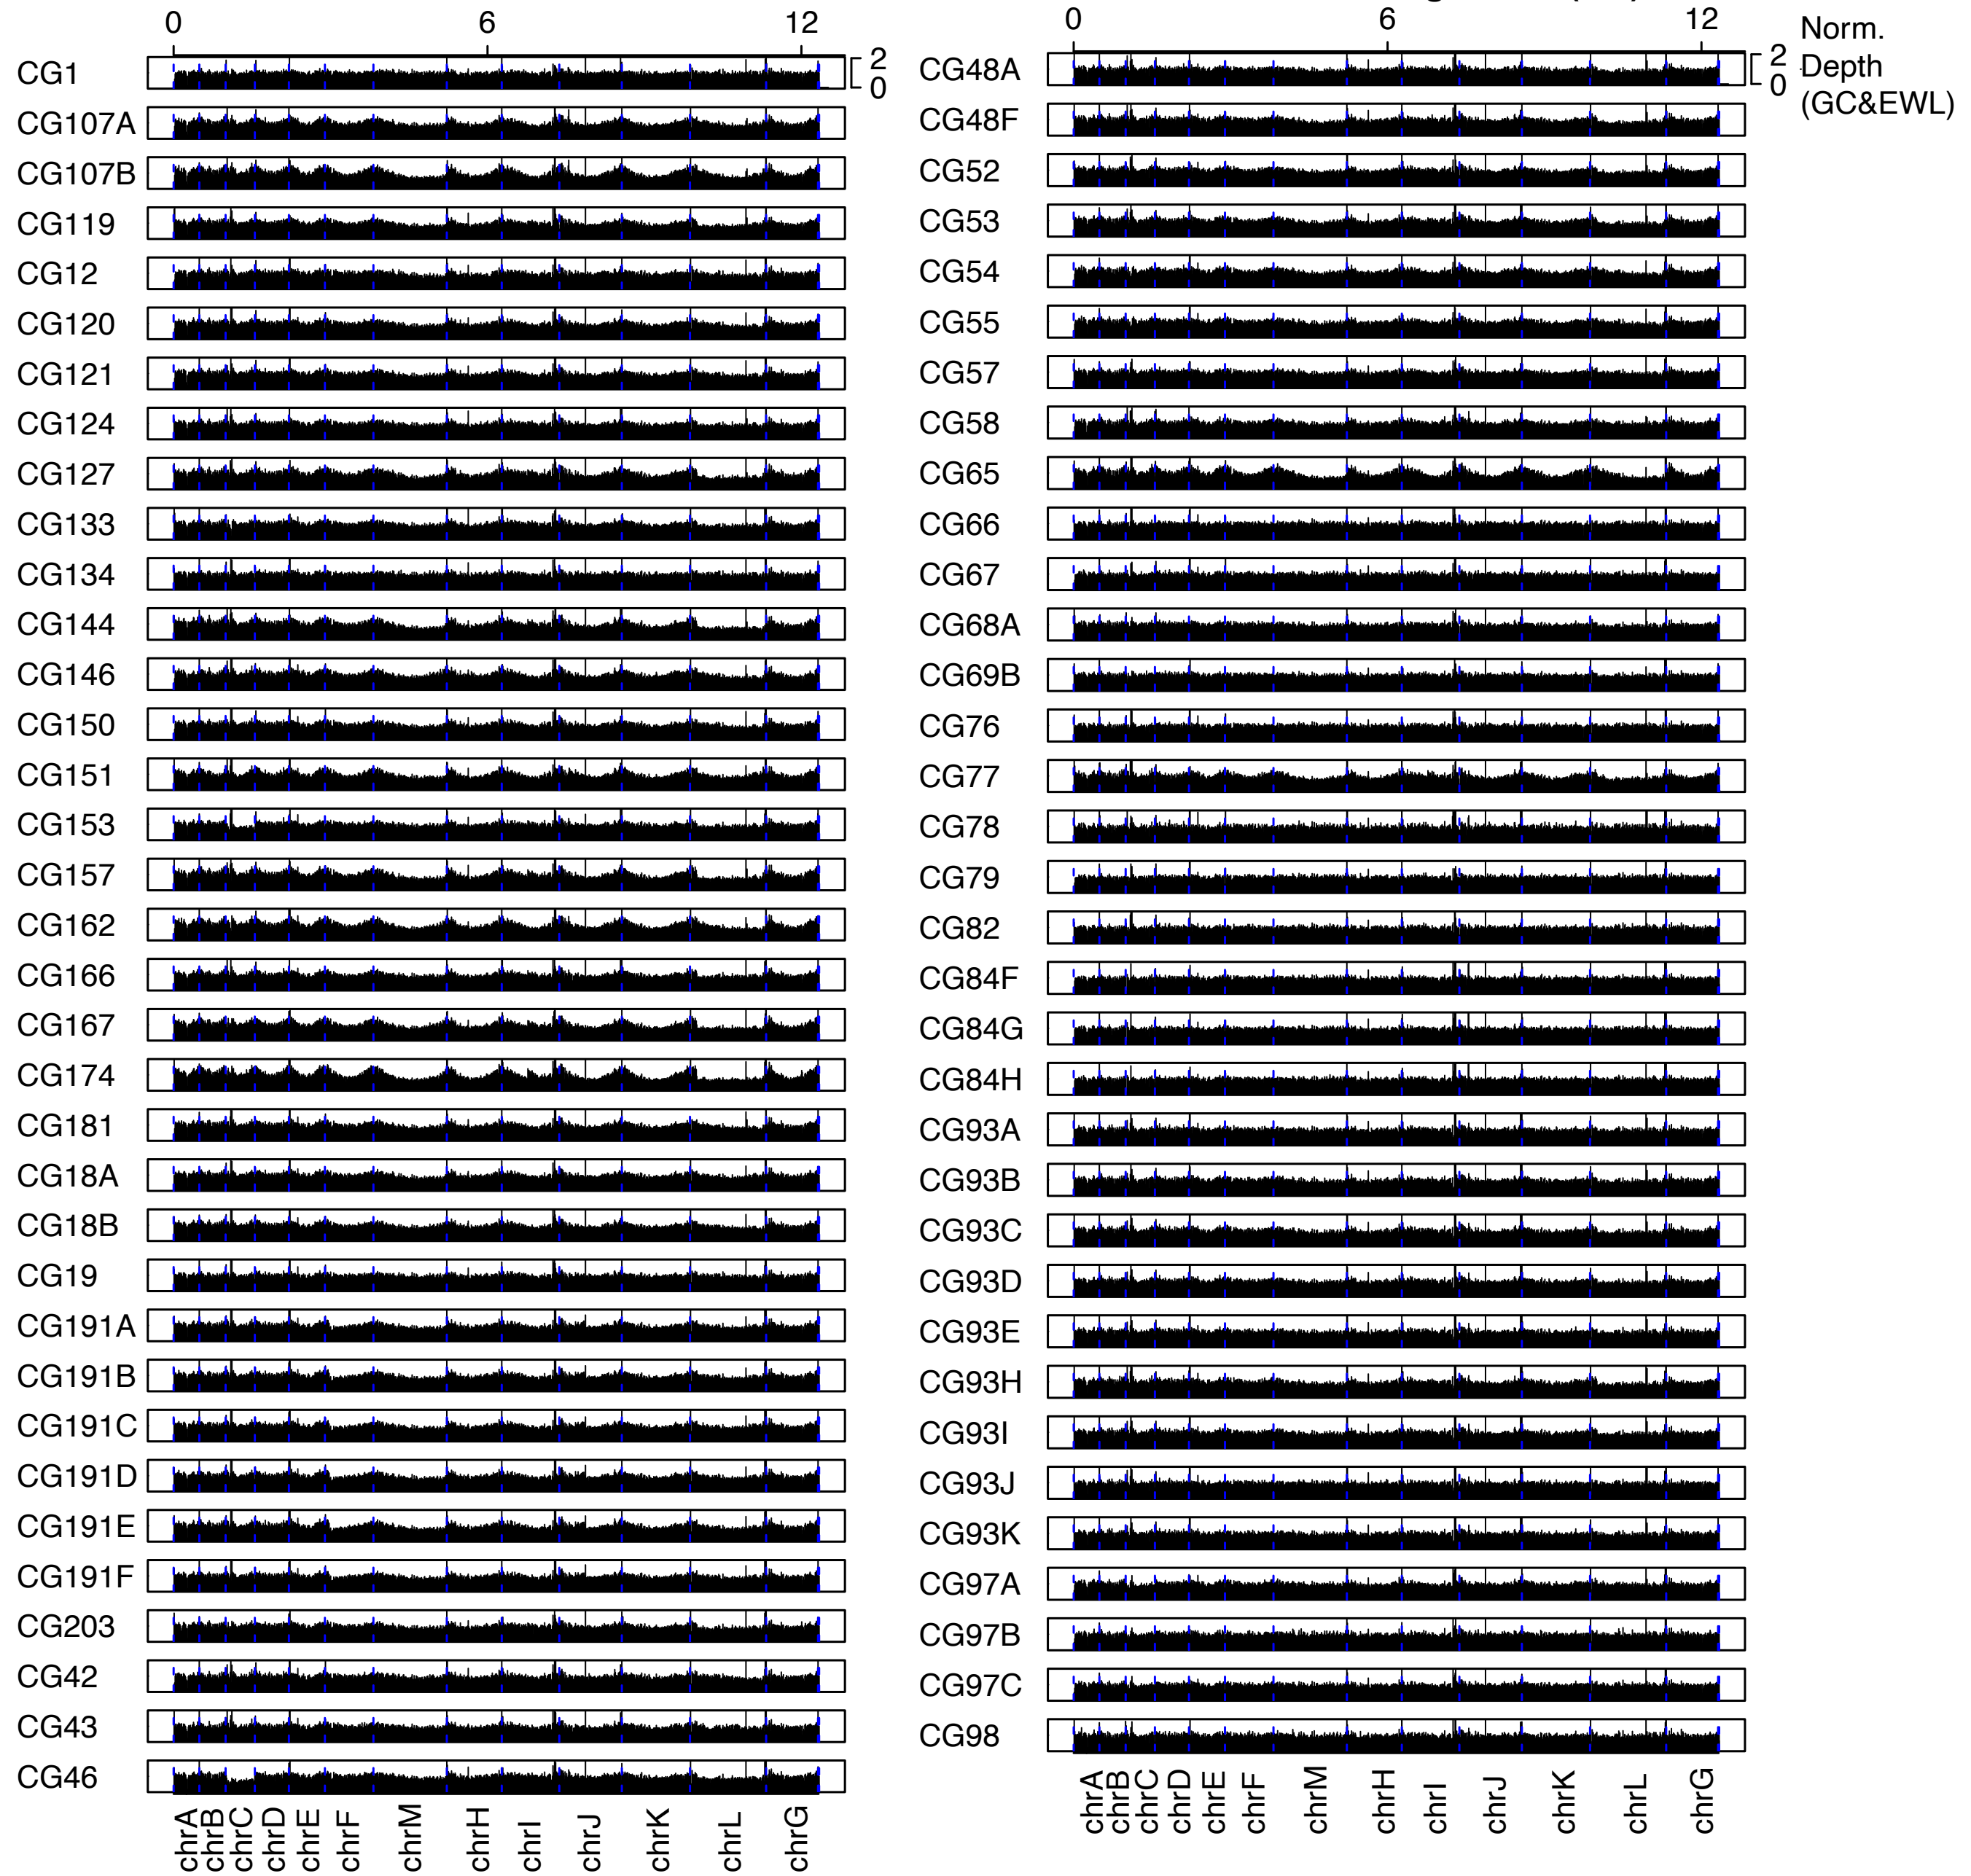

Supplement: iyac031_supplementary_figure_s5.pdf [file iyac031_supplementary_figure_s5.pdf]
